# Supplementary material for: A New Human Anatomy Teaching Mode Combining Virtual Anatomy System and Dissection to Promote Active Learning and Improve Learning Efficiency.
Source: Research Square preprint supplement (doi:10.21203/rs.3.rs-120997/v1), 2020-12-28
Supplement: Supplementary file 1 [file bd1c2a51bcf60ce36f5fb22e.docx]

Table 1. Basic statistical data of CVA group and TA group

Groups CVA Groups (n=66) TA group (n=104)

Male/Female 51/15 84/20

Mean age (years) 19.1 19.0

Table 2. Mean score of medical students’ questions in CVA group using a Five-Point Likert-style Scale With 1 = strongly Disagree, 2 = Disagree, 3 = Undecided, 4 = Agree and 5 = strongly Agree

Survey question to students Mean ± SD

Q1. Virtual anatomy study mode is interesting. 4.5±0.6

Q2. Virtual Anatomy System is facilitated and convenient 4.4 ± 0.7

to learn anatomy.

Q3. Virtual anatomy study mode was effective for 4.9±0.3

developing my 3D spatial thinking ability.

Q4. I can generally remember the 3D shape of 3.9±0.8

human structures through Virtual Anatomy System.

Q5. I can achieve and master the anatomy information 4.1±0.6

in short time through Virtual Anatomy System.

Q6. I can understand and master the abstract anatomical 3.5±0.8

structures such as fascia, space, ligament, etc through

Virtual Anatomy System.

Q7. I can understand some complicated anatomy area 3.3±0.9

such as axilliary fossa, pelvis, etc through

Virtual Anatomy System.

Q8. I nearly can learn and master all the structures 4.4±0.7

which the textbook and teaching program mention through

Virtual Anatomy System.

Q9. I can achieve rich information of anatomy course 4.0±0.7

through this combination study mode.

Q10. Virtual Anatomy System can strengthen 4.4±0.6

the communication between teachers and students.

Q11. If you only study human anatomy through 3.0±0.9

Virtual Anatomy System, I can achieve rich information

of anatomy course.

Q12. I like Virutal Anatomy System, because it provides 4.2±0.7

enough opportunity for me to participate in learning activities actively.

Q13. Do you agree that this study mode is useful for 4.6±0.6

human anatomy knowledge understanding and application.

Q14. I like this study style combinating traditional study 4.7±0.5

mode and virtual anatomy study mode.

Q15. I think this study mode combinating traditional and 4.6±0.5

virtual anatomy can take the place of traditional anatomy study mode.

Q16. I think Virtual Anatomy System can take place of 2.7±1.0

traditional anatomy course.

Q17. The aims of this course were met. 4.5±0.6

Q18. The tutor can guide the course adequately. 4.1±0.7

Q19. The virtual anatomy study mode can improve 4.4±0.5

my self-study ability.

Q20. Overall, I was satisfied with the quality of 4.4±0.6

this combination study mode.

Table 3. Mean score of participating teacher’ questions using a Five-Point Likert-style Scale With 1 = strongly Disagree, 2 = Disagree, 3 = Undecided, 4 = Agree and 5 = strongly Agree

Survey question to teachers Mean±SD

Q1. Do you agree that CVA study mode is a more scientific 4.0±0.8

way of teaching than TA study mode?

Q2. Do you agree that CVA study mode’s environment is 4.6±0.5

more comfortable than TA mode?

Q3. Do you agree that CVA mode can increase my motivation 4.5±0.5

to do well in the course?

Q4. Do you agree that CVA mode can raise students’ interest 4.1±0.6

in the course?

Q5. Do you agree that CVA mode can provide rich anatomy 3.3±0.5

information to students?

Q6. Do you agree that CVA can provide more detailed 3.5±0.8

anatomy information about complicated and abstract

structure such as axillary fossa, superficial perineal space,

etc than TA?

Q7. Do you agree that CVA can develop self-directed learning skills? 4.3±0.5

Q8. Do you agree that pure CVA mode can met the aim of the course? 2.6±1.2

Q9. Do you agree that CVA mode can totally take the 2.6±0.5

place of traditional anatomy study mode?

Q10. Do you agree that combination study mode including 4.1±0.8

CVA course and TA course can take the place of

traditional anatomy course?
